# Supplementary material
Source: PubMed Central journal article supplement (PMC6993941)
Supplement: NIHMS1549466-supplement-Supplemental_Publication_Material.pdf [file NIHMS1549466-supplement-Supplemental_Publication_Material.pdf]

**SUPPLEMENTAL MATERIAL**

**Supplemental Table 1. Additional demographic characteristics by Hispanic census tract.**

|                      | Hispanic Neighborhood Census Tract |           |           |           |
|----------------------|------------------------------------|-----------|-----------|-----------|
|                      | <25%                               | 25%-50%   | 51%-75%   | >75%      |
| <b>Time of day</b>   |                                    |           |           |           |
| 11:00pm-5:59am       | 2,527 (18%)                        | 571 (21%) | 341 (21%) | 135 (19%) |
| 6:00am-8:59am        | 1,899 (14%)                        | 385 (15%) | 233 (14%) | 80 (11%)  |
| 9:00am-3:59pm        | 4,783 (35%)                        | 866 (32%) | 545 (34%) | 260 (36%) |
| 4:00pm-6:59pm        | 2,106 (15%)                        | 396 (15%) | 239 (15%) | 106 (15%) |
| 7:00pm-10:59pm       | 2,452 (18%)                        | 466 (17%) | 264 (16%) | 133 (19%) |
| <b>Location type</b> |                                    |           |           |           |
| Street, highway      | 633 (4%)                           | 112 (4%)  | 66 (4%)   | 37 (5%)   |
| Public building      | 223 (2%)                           | 53 (2%)   | 30 (2%)   | 13 (2%)   |
| Place of recreation  | 320 (2%)                           | 35 (1%)   | 16 (1%)   | 9 (1%)    |

|                                       |              |             |             |             |
|---------------------------------------|--------------|-------------|-------------|-------------|
| Home                                  | 11,290 (82%) | 2,232 (83%) | 1,396 (87%) | 587 (83%)   |
| Other public                          | 1,250 (9%)   | 236 (9%)    | 97 (6%)     | 57 (8%)     |
| Other non-public                      | 119 (1%)     | 16 (1%)     | 7 (0%)      | 5 (1%)      |
| <b>Age, years</b>                     | 64.19±17.28  | 62.25±17.15 | 62.60±17.04 | 62.97±17.63 |
| <b>Male</b>                           | 8,864 (64%)  | 1,654 (61%) | 997 (61%)   | 442 (62%)   |
| <b>Calling 911, to arrival of EMS</b> | 5.41±2.44    | 4.89±1.78   | 4.88±2.03   | 4.60±1.55   |
| <b>Witnessed</b>                      | 5,857 (44%)  | 1,058 (41%) | 616 (40%)   | 271 (40%)   |
| <b>Survival to hospital discharge</b> |              |             |             |             |
| Yes                                   | 1,760 (13%)  | 290 (11%)   | 135 (8%)    | 43 (6%)     |

---

EMS: Emergency Medical Services

**Supplemental Table 2. Multivariable regression model assessing likelihood of B-CPR delivery by neighborhood-level ethnicity with multiple imputation**

|                                  | <b>B-CPR</b><br>OR (95% CI)<br>n=17,208 | <b>Global</b> | <b>p-value</b> |
|----------------------------------|-----------------------------------------|---------------|----------------|
| <b>Hispanic neighborhood</b>     |                                         |               |                |
| <b>Census tract, OR (95% CI)</b> |                                         |               |                |
| <b>&lt;25%</b>                   | -                                       | 0.004         |                |
| <b>25%-50%</b>                   | 0.91 (0.83-1.01)                        |               | 0.093          |
| <b>51%-75%</b>                   | 0.85 (0.74-0.97)                        |               | 0.014          |
| <b>&gt;75%</b>                   | 0.74 (0.61-0.90)                        |               | 0.002          |

B-CPR: Bystander cardiopulmonary resuscitation, OR: Odds Ratio, CI: Confidence Interval. Controlling for site, time of day, location type, age, race of patient, ethnicity of patient, gender, bystander call to arrival of emergency medical services, and witness status.

**Supplemental Table 3. Multivariable regression model assessing likelihood of survival by neighborhood ethnicity with multiple imputation**

|                                  | <b>Survival</b><br>OR (95% CI)<br>n=18,590 | <b>Global</b> | <b>p-value</b> |
|----------------------------------|--------------------------------------------|---------------|----------------|
| <b>Hispanic neighborhood</b>     |                                            |               |                |
| <b>Census tract, OR (95% CI)</b> |                                            |               |                |
| <b>&lt;25%</b>                   | -                                          | <0.001        |                |
| <b>25%-50%</b>                   | 0.98 (0.85-1.12)                           |               | 0.764          |
| <b>51%-75%</b>                   | 0.83 (0.69-1.01)                           |               | 0.068          |
| <b>&gt;75%</b>                   | 0.52 (0.38-0.72)                           |               | <0.001         |

OR: Odds Ratio, CI: Confidence Interval. Controlling for site, episode time, location type, age, gender, race and ethnicity of patient

**Supplemental Table 4. Multivariable regression model assessing likelihood of B-CPR and survival by neighborhood ethnicity including median household income**

|                                  | <b>B-CPR</b><br>OR (95% CI)<br>n=9,379 | <b>Global</b> | <b>p-value</b> | <b>Survival</b><br>OR (95% CI)<br>n=10,178 | <b>Global</b> | <b>p-value</b> |
|----------------------------------|----------------------------------------|---------------|----------------|--------------------------------------------|---------------|----------------|
| <b>Hispanic neighborhood</b>     |                                        |               |                |                                            |               |                |
| <b>Census tract, OR (95% CI)</b> |                                        |               |                |                                            |               |                |
| <b>&lt;25%</b>                   | -                                      | 0.036         |                | -                                          | 0.028         |                |
| <b>25%-50%</b>                   | 0.92 (0.79-1.06)                       |               | 0.258          | 1.20 (0.98-1.46)                           |               | 0.075          |
| <b>51%-75%</b>                   | 0.78 (0.64-0.95)                       |               | 0.015          | 1.06 (0.80-1.42)                           |               | 0.668          |
| <b>&gt;75%</b>                   | 0.74 (0.56-0.98)                       |               | 0.035          | 0.57 (0.35-0.94)                           |               | 0.028          |

OR: Odds Ratio, CI: Confidence Interval, B-CPR: Bystander cardiopulmonary resuscitation, Global: Global P-value from the Wald test. Multivariable regression for B-CPR controlled for site, time of day, location type, age, race of patient, ethnicity of patient, gender, bystander call to arrival of EMS, witness, and median household income. Multivariable regression for survival included site, episode time, location type, age, gender, race of patient, and median household income.
